# Supplementary material
Source: publisher site journal article supplement (https://www.dovepress.com/get_supplementary_file.php?f=277530.docx)
Supplement: Supplementary file 1 [file get_supplementary_file.php]

| Table S1 The ordinal logistic regression analyses examining the individual relationship between items of Brief Symptom Rating Scale with insomnia symptoms | | | | |
| --- | --- | --- | --- | --- |
|  | Insomnia symptoms | | | |
|  | OR (95% CI) | OR (95% CI) | OR (95% CI) | OR (95% CI) |
| Brief Symptom Rating Scale |  |  |  |  |
| Feeling tense or "keyed up | 2.89 (2.78-3.00) | - | - | - |
| Feeling easily annoyed or irritated | - | 2.70 (2.60-2.79) | - | - |
| Feeling blue | - | - | 3.01 (2.90-3.13) | - |
| Feeling inferior to others | - | - | - | 2.21 (2.13-2.30) |
| Age (years) |  |  |  |  |
| 15-24 vs. 24-34 | 0.52 (0.46-0.58) | 0.56 (0.50-0.63) | 0.55 (0.49-0.62) | 0.51 (0.46-0.58) |
| 35-44 vs. 24-34 | 1.21 (1.10-1.34) | 1.26 (1.14-1.39) | 1.17 (1.06-1.29) | 1.21 (1.09-1.33) |
| 45-54 vs. 24-34 | 1.39 (1.25-1.55) | 1.57 (1.41-1.74) | 1.36 (1.22-1.51) | 1.38 (1.24-1.54) |
| 55-64 vs. 24-34 | 1.56 (1.39-1.75) | 1.86 (1.66-2.09) | 1.55 (1.38-1.74) | 1.54 (1.38-1.73) |
| ≥ 65 vs. 24-34 | 1.44 (1.27-1.63) | 1.73 (1.53-1.96) | 1.46 (1.29-1.65) | 1.47 (1.30-1.66) |
| Sex (women vs. men) | 1.22 (1.15-1.28) | 1.22 (1.03-1.30) | 1.28 (1.20-1.35) | 1.32 (1.23-1.39) |
| Education |  |  |  |  |
| Senior high school and below vs. college and above | 1.26 (1.18-1.35) | 1.19 (1.11-1.27) | 1.20 (1.12-1.28) | 1.17 (1.10-1.25) |
| Marital status |  |  |  |  |
| Married vs. single | 0.82 (0.75-0.89) | 0.76 (0.69-0.83) | 0.84 (0.77-0.92) | 0.86 (0.78-0.93) |
| Widowed vs. single | 1.22 (1.04-1.43) | 1.18 (1.01-1.38) | 1.19 (1.02-1.39) | 1.35 (1.16-1.58) |
| Job (no vs. yes) | 1.17 (1.09-1.25) | 1.19 (1.11-1.27) | 1.15 (1.07-1.24) | 1.14 (1.06-1.22) |
| Survey year (calendar years) | 1.00 (0.99-1.01) | 1.00 (1.00-1.01) | 1.01 (1.00-1.02) | 1.00 (0.99-1.01) |

| Table S2 The ordinal logistic regression analyses examining the individual relationship between items of Brief Symptom Rating Scale with insomnia symptoms in men | | | | |
| --- | --- | --- | --- | --- |
|  | Insomnia symptoms | | | |
|  | OR (95% CI) | OR (95% CI) | OR (95% CI) | OR (95% CI) |
| Brief Symptom Rating Scale |  |  |  |  |
| Feeling tense or "keyed up | 2.98 (2.82-3.16) | - | - | - |
| Feeling easily annoyed or irritated | - | 2.81 (2.67-2.96) | - | - |
| Feeling blue | - | - | 3.13 (2.96-3.30) | - |
| Feeling inferior to others | - | - | - | 2.12 (2.01-2.23) |
| Age (years) |  |  |  |  |
| 15-24 vs. 24-34 | 0.48 (0.40-0.57) | 0.51 (0.43-0.61) | 0.52 (0.44-0.63) | 0.48 (0.40-0.57) |
| 35-44 vs. 24-34 | 1.31 (1.13-1.52) | 1.34 (1.15-1.56) | 1.23 (1.06-1.44) | 1.30 (1.12-1.51) |
| 45-54 vs. 24-34 | 1.45 (1.23-1.70) | 1.60 (1.36-1.88) | 1.41 (1.20-1.65) | 1.41 (1.21-1.66) |
| 55-64 vs. 24-34 | 1.51 (1.27-1.80) | 1.68 (1.41-2.01) | 1.46 (1.22-1.74) | 1.46 (1.23-1.74) |
| ≥ 65 vs. 24-34 | 1.37 (1.12-1.67) | 1.54 (1.27-1.88) | 1.35 (1.11-1.65) | 1.36 (1.12-1.66) |
| Education |  |  |  |  |
| Senior high school and below vs. college and above | 1.27 (1.15-1.39) | 1.20 (1.09-1.32) | 1.24 (1.13-1.37) | 1.20 (1.09-1.32) |
| Marital status |  |  |  |  |
| Married vs. single | 0.76 (0.66-0.86) | 0.74 (0.65-0.84) | 0.82 (0.72-0.94) | 0.82 (0.72-0.93) |
| Widowed vs. single | 1.12 (0.87-1.43) | 0.98 (0.77-1.25) | 1.03 (0.80-1.32) | 1.26 (0.99-1.61) |
| Job (no vs. yes) | 1.14 (1.01-1.28) | 1.18 (1.04-1.32) | 1.11 (0.98-1.25) | 1.15 (1.02-1.29) |
| Survey year (calendar years) | 1.00 (0.99-1.01) | 1.00 (0.99-1.01) | 1.01 (1.00-1.02) | 1.00 (0.99-1.01) |

| Table S3 The ordinal logistic regression analyses examining the individual relationship between items of Brief Symptom Rating Scale with insomnia symptoms in women | | | | |
| --- | --- | --- | --- | --- |
|  | Insomnia symptoms | | | |
|  | OR (95% CI) | OR (95% CI) | OR (95% CI) | OR (95% CI) |
| Brief Symptom Rating Scale |  |  |  |  |
| Feeling tense or "keyed up | 2.81 (2.67-2.97) | - | - | - |
| Feeling easily annoyed or irritated | - | 2.62 (2.49-2.75) | - | - |
| Feeling blue | - | - | 2.92 (2.77-3.07) | - |
| Feeling inferior to others | - | - | - | 2.31 (2.19-2.44) |
| Age (years) |  |  |  |  |
| 15-24 vs. 24-34 | 0.57 (0.48-0.67) | 0.61 (0.52-0.72) | 0.58 (0.49-0.69) | 0.55 (0.47-0.65) |
| 35-44 vs. 24-34 | 1.14 (0.99-1.30) | 1.19 (1.04-1.36) | 1.11 (0.97-1.28) | 1.13 (0.99-1.30) |
| 45-54 vs. 24-34 | 1.35 (1.17-1.56) | 1.53 (1.33-1.77) | 1.32 (1.14-1.52) | 1.36 (1.18-1.57) |
| 55-64 vs. 24-34 | 1.62 (1.39-1.89) | 2.01 (1.72-2.36) | 1.63 (1.39-1.90) | 1.62 (1.39-1.89) |
| ≥ 65 vs. 24-34 | 1.53 (1.30-1.81) | 1.89 (1.60-2.23) | 1.56 (1.32-1.84) | 1.57 (1.33-1.85) |
| Education |  |  |  |  |
| Senior high school and below vs. college and above | 1.23 (1.12-1.36) | 1.15 (1.05-1.27) | 1.14 (1.03-1.25) | 1.13 (1.03-1.25) |
| Marital status |  |  |  |  |
| Married vs. single | 0.89 (0.79-1.01) | 0.80 (0.71-0.91) | 0.88 (0.77-0.99) | 0.91 (0.80-1.03) |
| Widowed vs. single | 1.31 (1.07-1.61) | 1.32 (1.08-1.62) | 1.30 (1.06-1.60) | 1.43 (1.17-1.76) |
| Job (no vs. yes) | 1.17 (1.07-1.29) | 1.20 (1.10-1.32) | 1.19 (1.09-1.31) | 1.14 (1.05-1.25) |
| Survey year (calendar years) | 1.00 (0.99-1.01) | 1.00 (0.99-1.01) | 1.01 (1.00-1.02) | 1.00 (0.99-1.01) |
